# Supplementary material
Source: Springer Nature journal article supplement (https://www.springermedizin.de/resource/supplementary/13000_2010_271_MOESM2_ESM.pdf/9624204)
Supplement: MOESM2 [file 9624204]

| TISSUE                 | SIMILARITY SCORE | LOW |   | 30 | HIGH<br>100 |
|------------------------|------------------|-----|---|----|-------------|
|                        |                  | 0   | 5 |    |             |
| Breast                 | 90.6             |     |   |    | ◆           |
| Non-Small Cell Lung    | 5.8              |     | ◆ |    |             |
| Colorectal             | 1.5              | ◆   |   |    |             |
| Ovarian                | 1.1              | ◆   |   |    |             |
| Pancreas               | 0.3              | ◆   |   |    |             |
| Bladder                | 0.2              | ◆   |   |    |             |
| Prostate               | 0.1              | ◆   |   |    |             |
| Thyroid                | 0.1              | ◆   |   |    |             |
| Kidney                 | 0.1              | ◆   |   |    |             |
| Hepatocellular         | 0.1              | ◆   |   |    |             |
| Gastric                | 0.1              | ◆   |   |    |             |
| Testicular Germ Cell   | 0.0              | ◆   |   |    |             |
| Soft Tissue Sarcoma    | 0.0              | ◆   |   |    |             |
| Melanoma               | 0.0              | ◆   |   |    |             |
| Non-Hodgkin's Lymphoma | 0.0              | ◆   |   |    |             |
